# Supplementary material for: Using empirical biological knowledge to infer regulatory networks from multi-omics data
Source: PubMed Central journal article supplement (PMC9396869; doi:10.1186/s12859-022-04891-9), 2022-08-22
Supplement: 12859_2022_4891_MOESM1_ESM.pdf [file 12859_2022_4891_MOESM1_ESM.pdf]

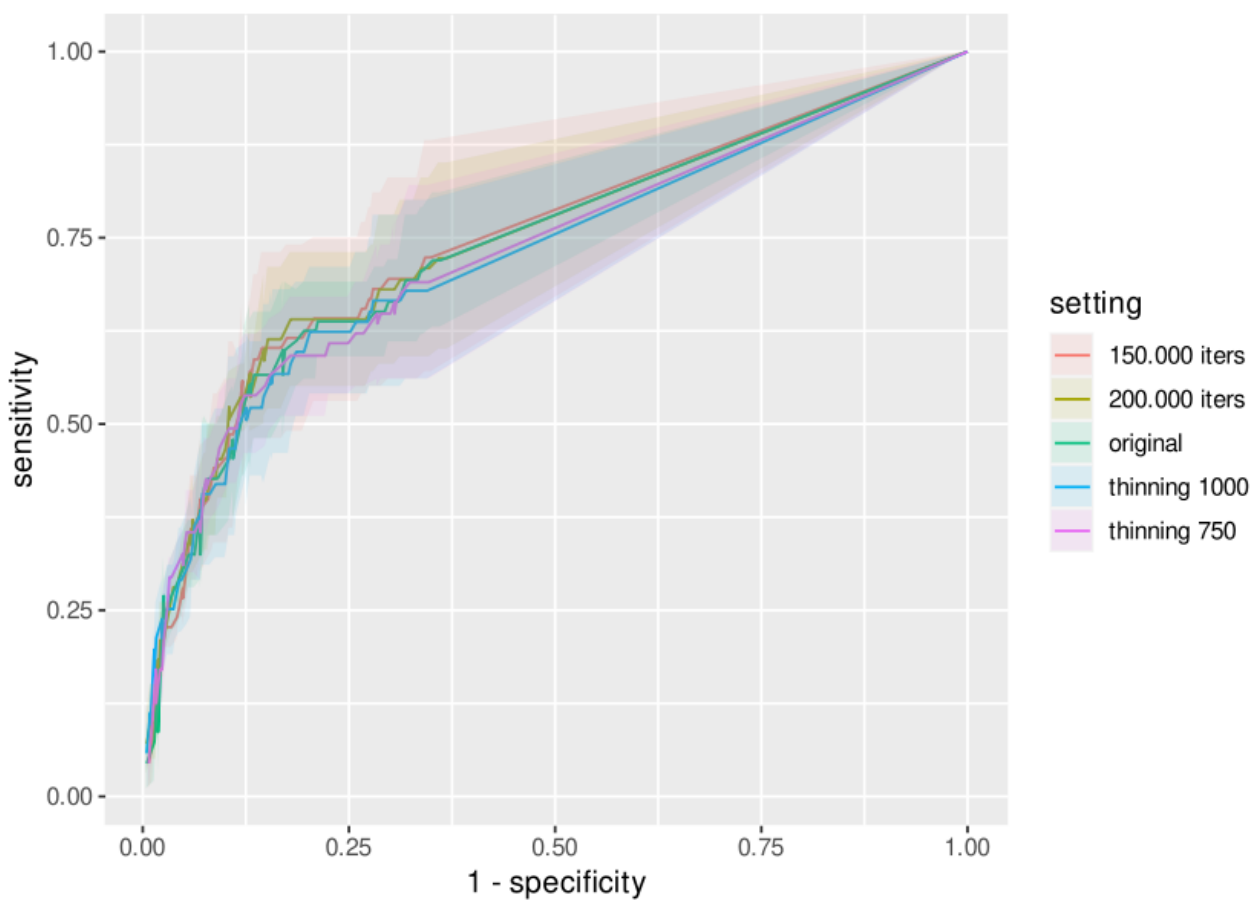

Supplementary Figure 1: Different IntOMICS hyperparameters setting in DREAM4 *in silico* dataset and the resulting ROC with 95% confidence intervals.

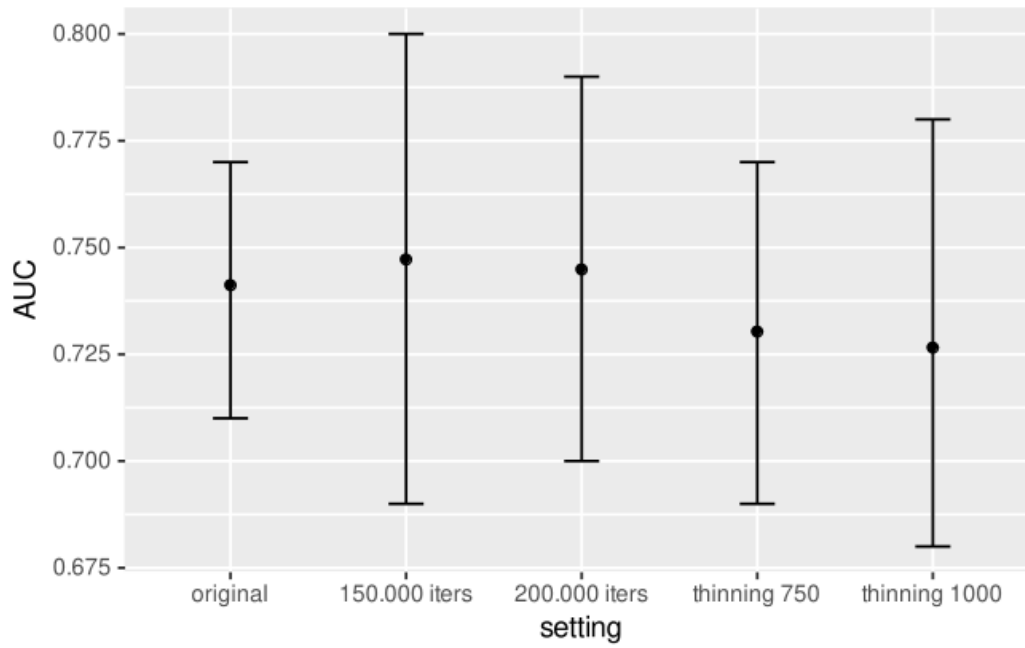

Supplementary Figure 2: Different IntOMICS hyperparameters setting in DREAM4 *in silico* dataset and the resulting AUC with 83% confidence intervals.

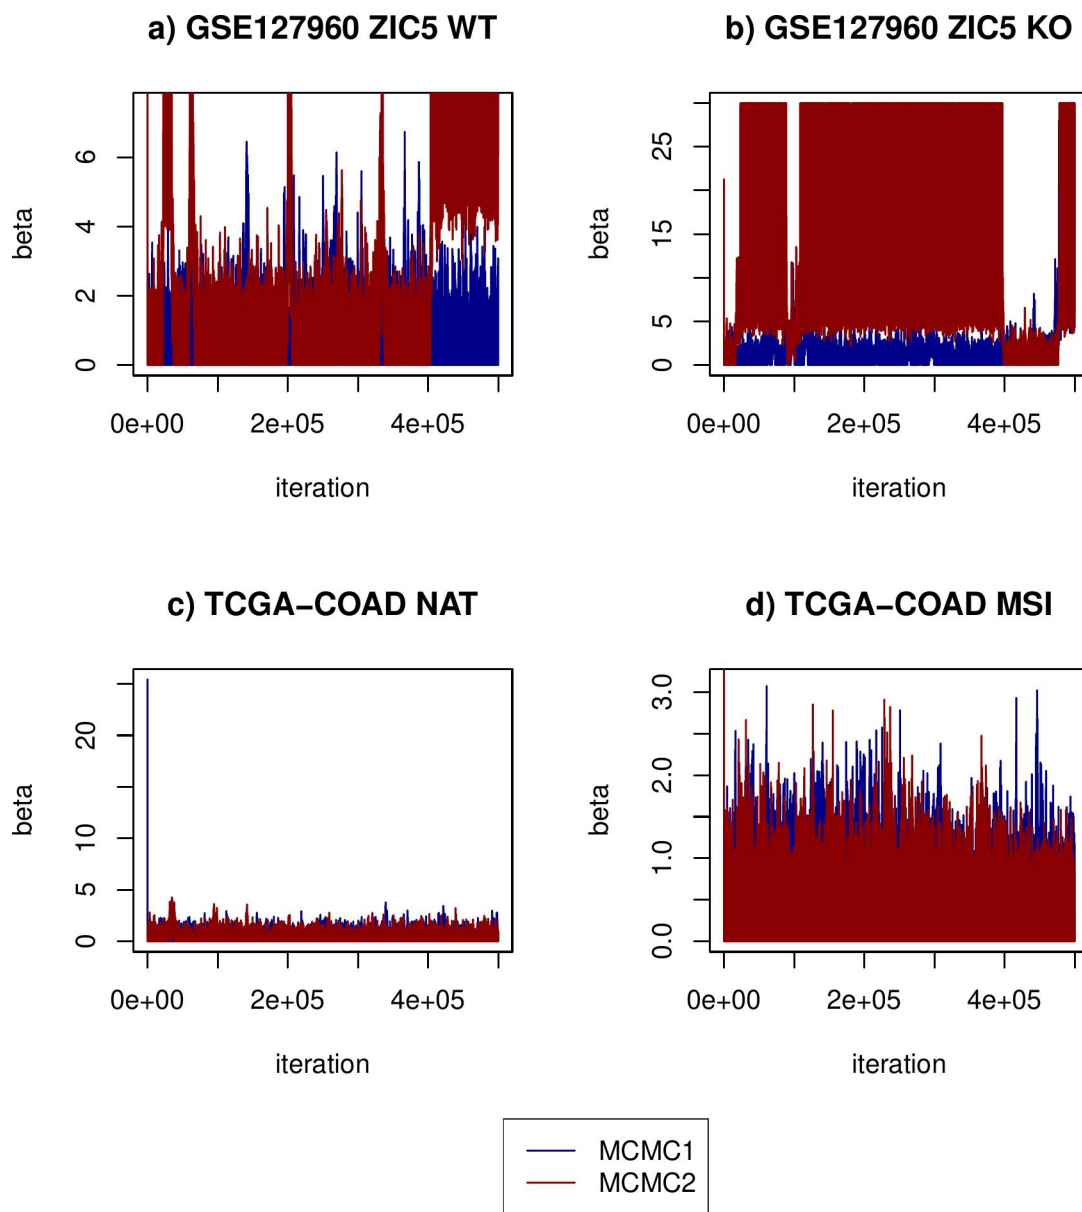

Supplementary Figure 3: Trace plot of  $\beta$  values using the W&H algorithm.

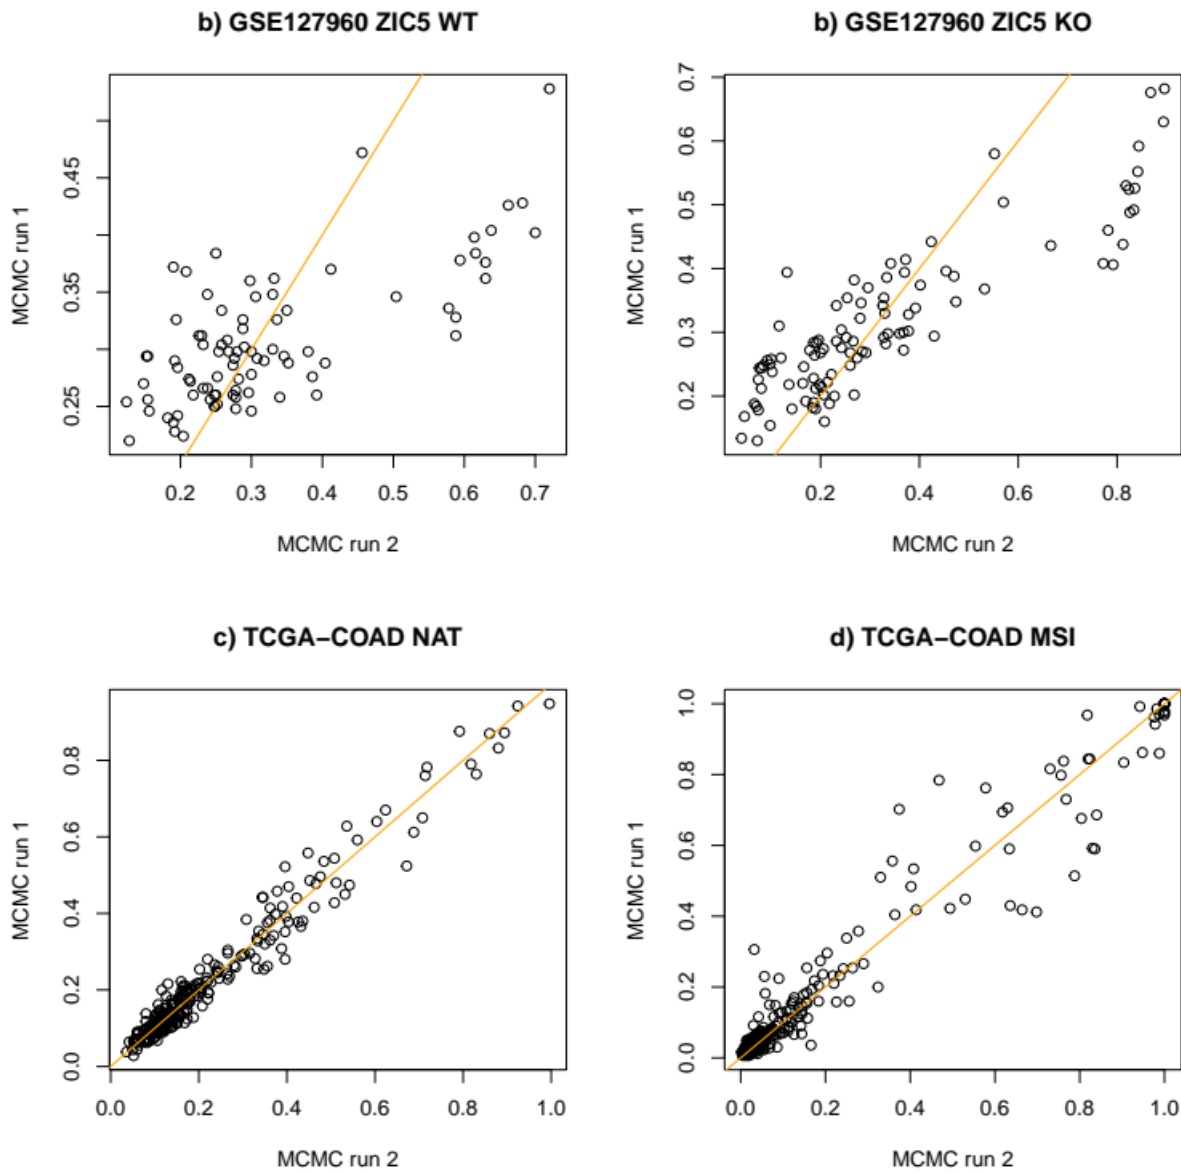

Supplementary Figure 4: Consistency in the marginal posterior probabilities of the edges using the W&H algorithm.

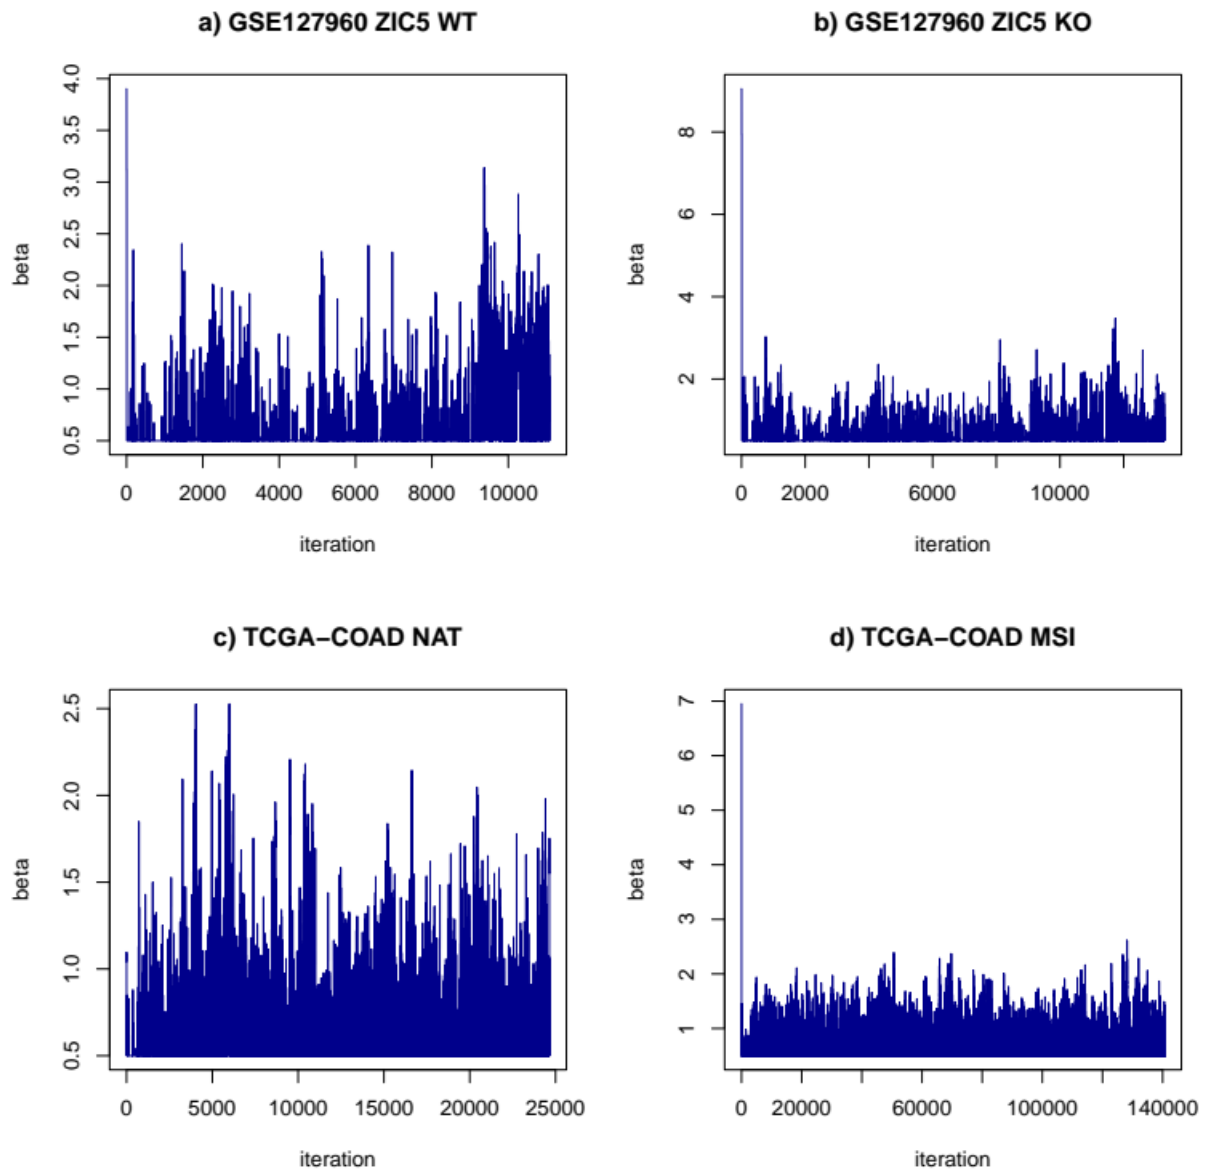

Supplementary Figure 5: Trace plot of  $\beta$  values using the IntOMICS algorithm.

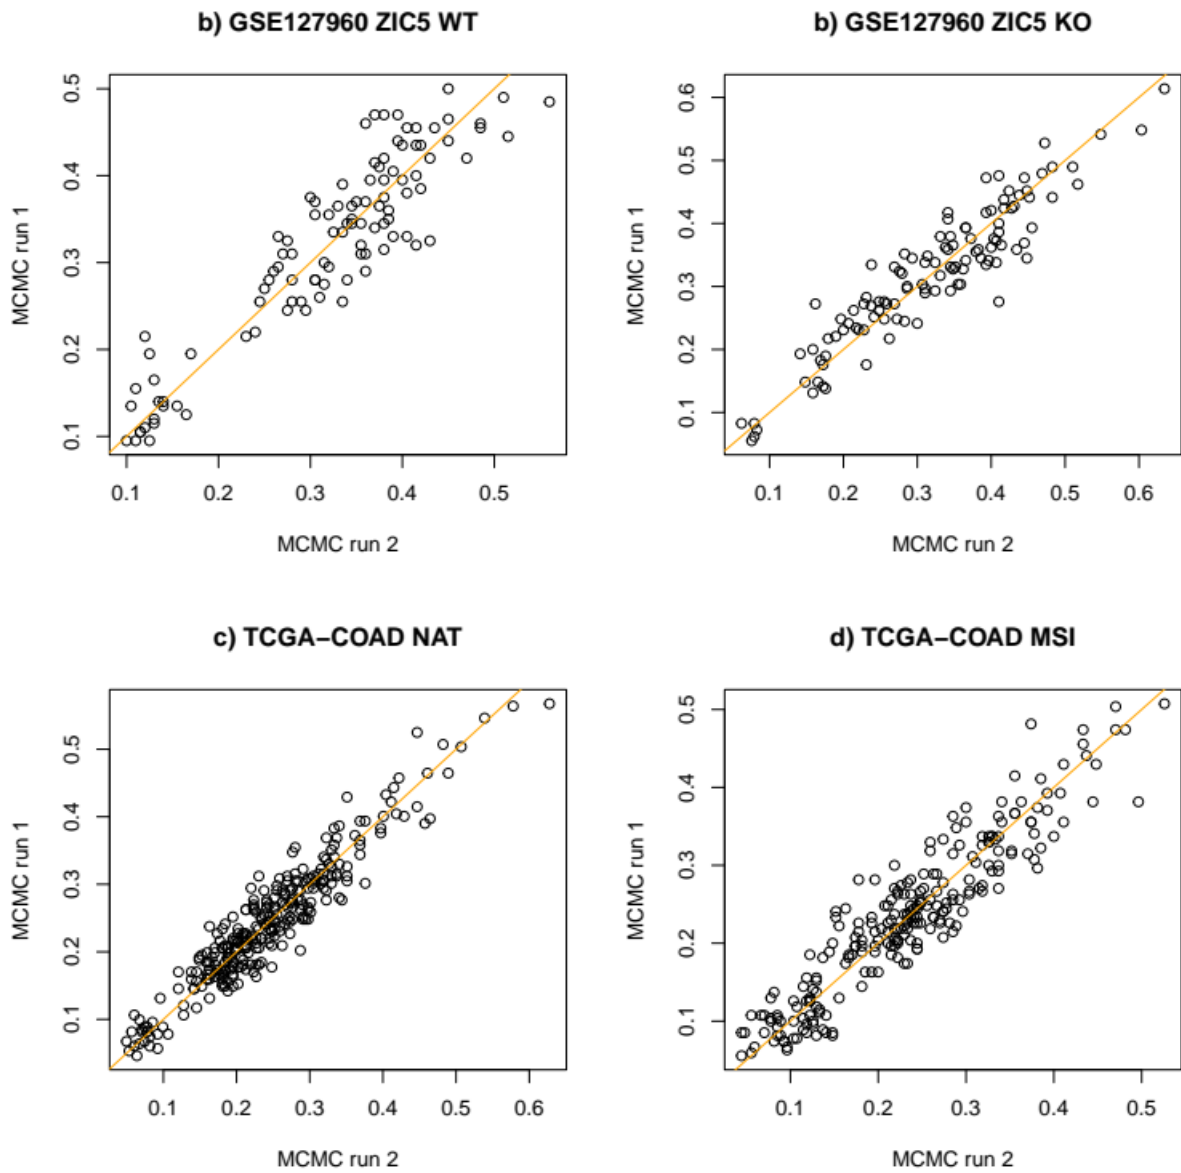

Supplementary Figure 6: Consistency in the marginal posterior probabilities of the edges using the IntOMICS algorithm.

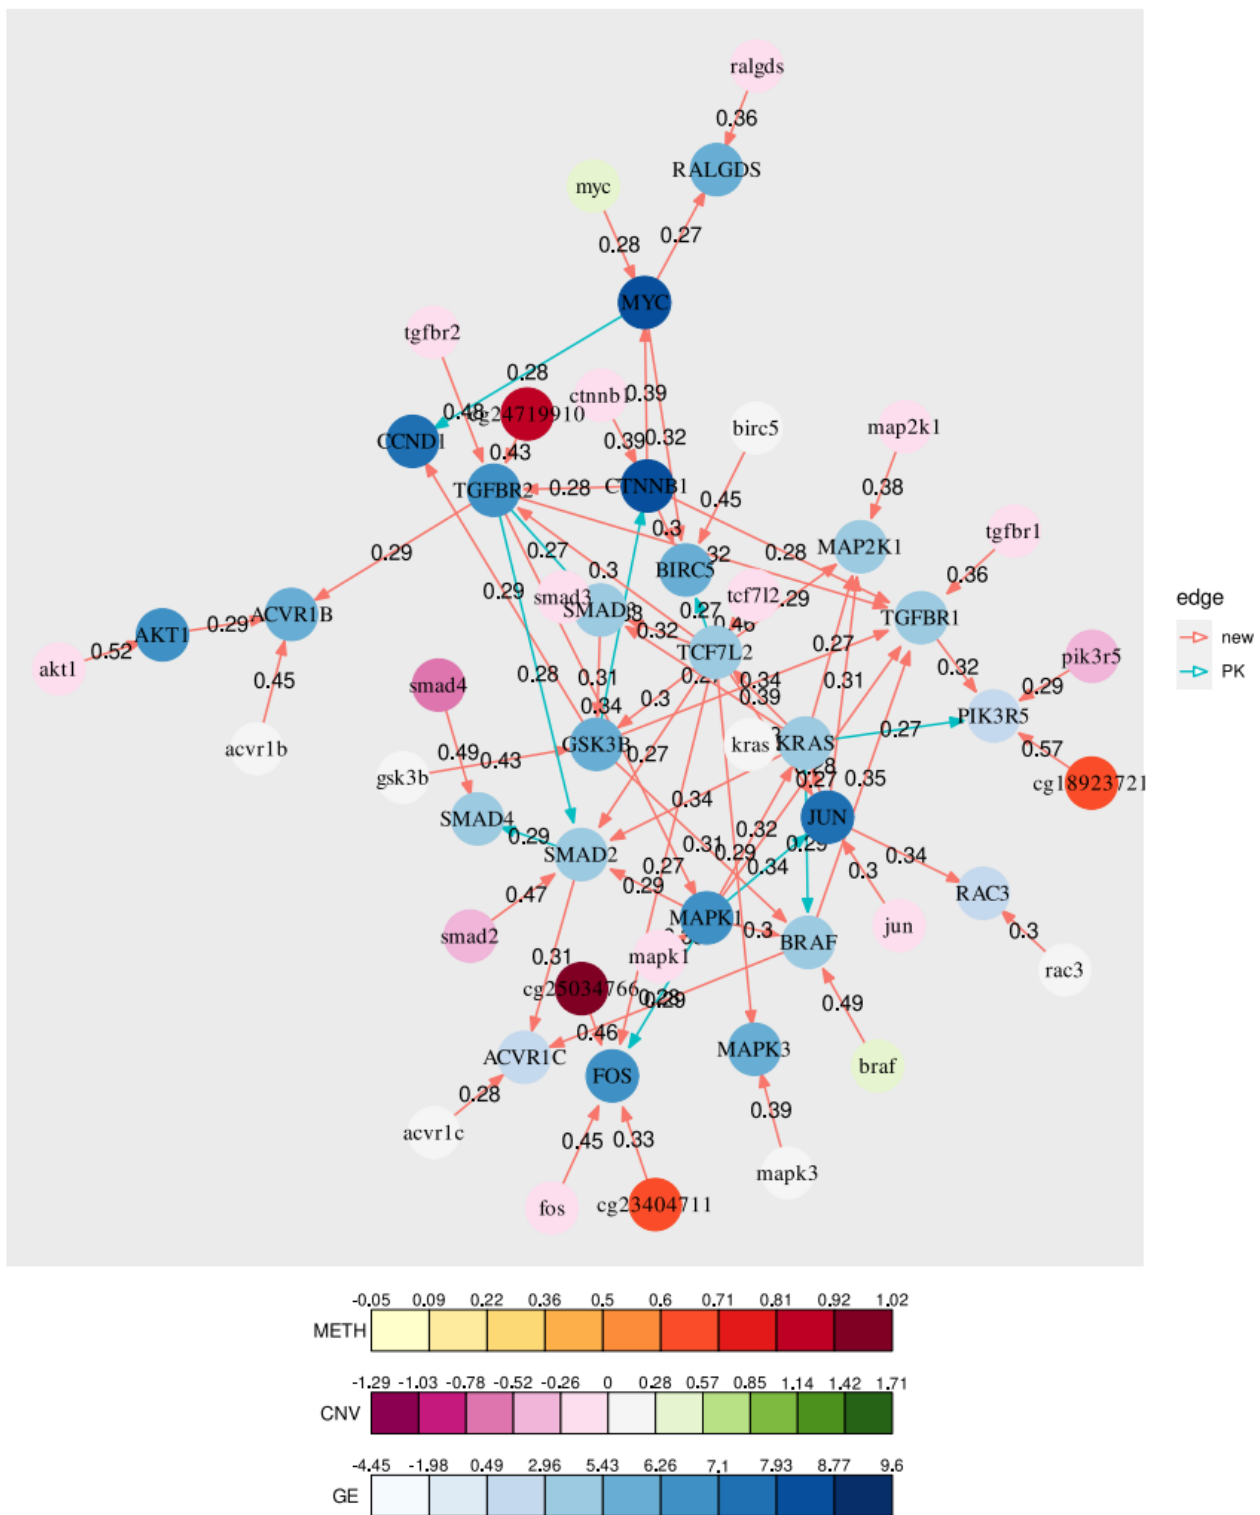

Supplementary Figure 7: CNVs specific for MSS colon cancer investigation and the resulting regulatory network inferred by IntOMICS algorithm using TCGA-COAD MSS stageII/III samples.

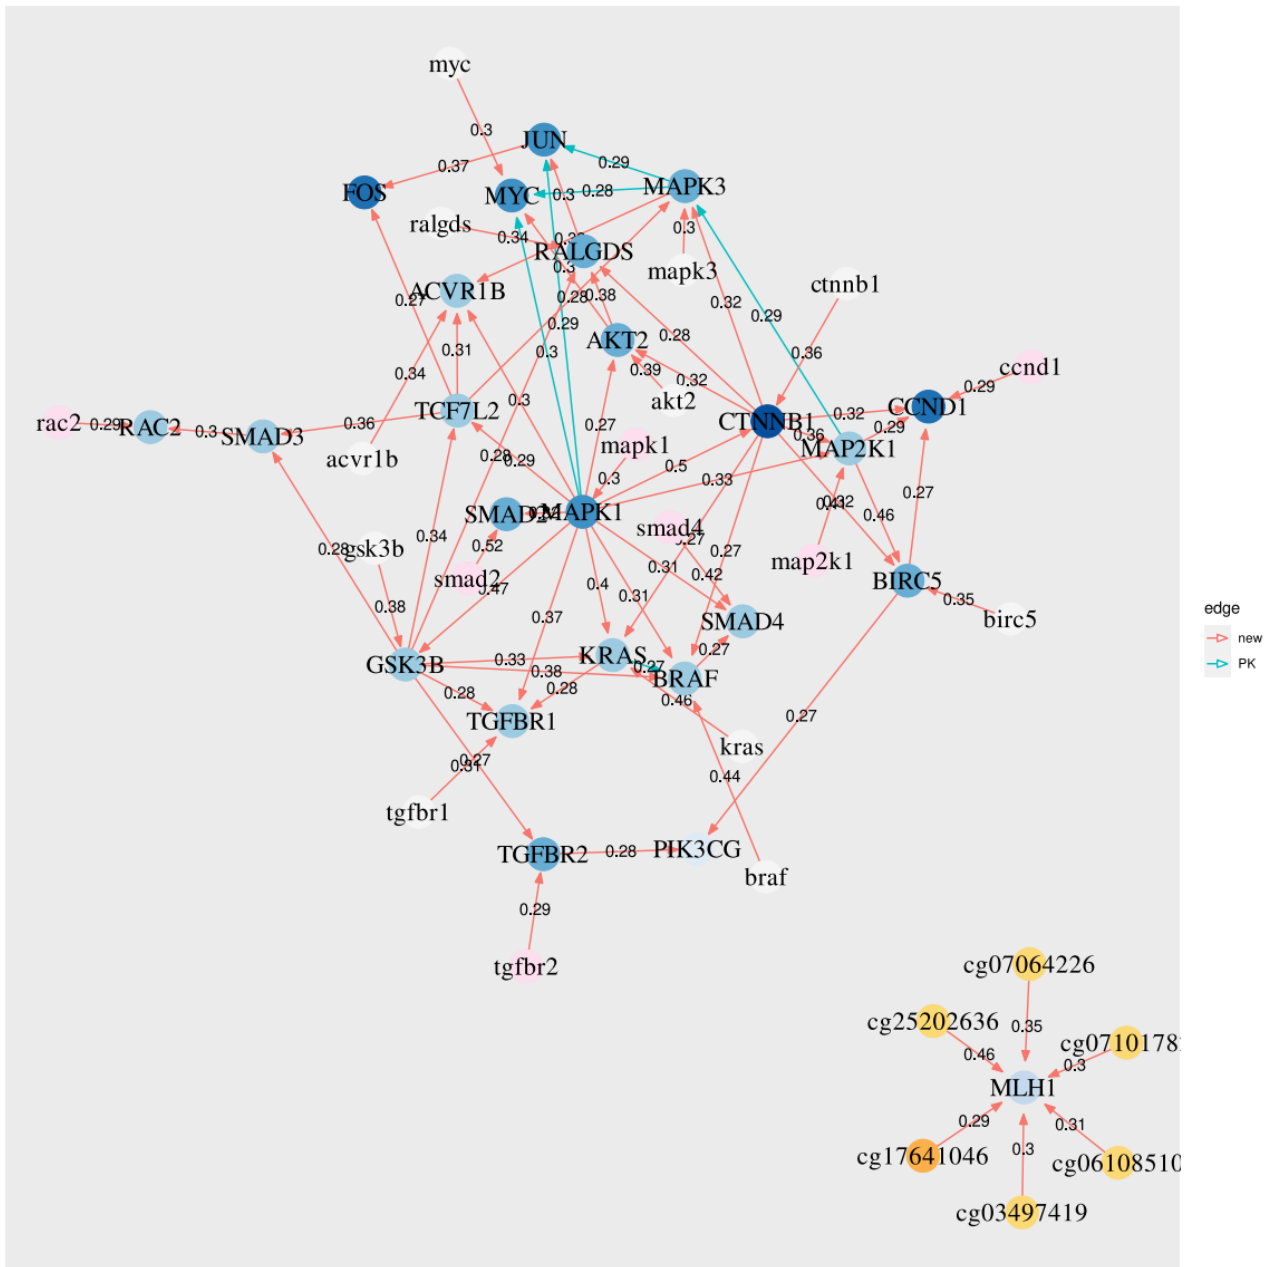

Supplementary Figure 8: DNA methylation specific for MSI colon cancer investigation and the resulting regulatory network inferred by IntOMICS algorithm using TCGA-COAD MSI samples.
