# Supplementary material for: Using empirical biological knowledge to infer regulatory networks from multi-omics data
Source: PubMed Central journal article supplement (PMC9396869; doi:10.1186/s12859-022-04891-9), 2022-08-22
Supplement: 12859_2022_4891_MOESM2_ESM.pdf [file 12859_2022_4891_MOESM2_ESM.pdf]

Sheet1

The performance of IntOMICS and W&H algorithm: corresponding AUC with 83% CIs, Cohen's Kappa coefficient, and running time.

| TCGA-COAD           |         |             |               |         |             |               |
|---------------------|---------|-------------|---------------|---------|-------------|---------------|
|                     | NAT     | AUC 83% CI  | Cohen's Kappa | MSI     | AUC 83% CI  | Cohen's Kappa |
| IntOMICS # features | 64      | 0.74        | 0.12          | 51      | 0.68        | 0.21          |
| time                | 57.12 h | (0.65;0.83) |               | 30.24 h | (0.59;0.77) |               |
| W&H # features      | 24      | 0.38        | 0.12          | 24      | 0.46        | 0.21          |
| time                | 28.08 h | (0.30;0.46) |               | 15.11 h | (0.37;0.55) |               |

| GSE127960           |        |             |               |        |             |               |
|---------------------|--------|-------------|---------------|--------|-------------|---------------|
|                     | WT     | AUC 83% CI  | Cohen's Kappa | KO     | AUC 83% CI  | Cohen's Kappa |
| IntOMICS # features | 16     | 0.75        | 0.19          | 16     | 0.73        | 0.38          |
| time                | 3.22 h | (0.6;0.9)   |               | 3.57 h | (0.58;0.88) |               |
| W&H # features      | 16     | 0.71        | 0.19          | 16     | 0.69        | 0.38          |
| time                | 6.66 h | (0.56;0.86) |               | 6.49 h | (0.54;0.84) |               |

| DREAM4              |        |               |        |               |        |               |        |               |        |               |
|---------------------|--------|---------------|--------|---------------|--------|---------------|--------|---------------|--------|---------------|
|                     | 1      | Cohen's Kappa | 2      | Cohen's Kappa | 3      | Cohen's Kappa | 4      | Cohen's Kappa | 5      | Cohen's Kappa |
| IntOMICS # features | 10     | 0.41          | 10     | 0.32          | 10     | 0.59          | 10     | 0.59          | 10     | 0.22          |
| time                | 1.29 h |               | 1.78 h |               | 1.32 h |               | 1.32 h |               | 1.56 h |               |
| W&H # features      | 10     | 0.41          | 10     | 0.32          | 10     | 0.59          | 10     | 0.59          | 10     | 0.22          |
| time                | 2.34 h |               | 2.16 h |               | 2.29 h |               | 2.27 h |               | 1.99 h |               |
